# Supplementary material
Source: Springer Nature journal article supplement (https://www.springermedizin.de/resource/supplementary/12885_2007_884_MOESM8_ESM.pdf/9470588)

**p=0.0028**

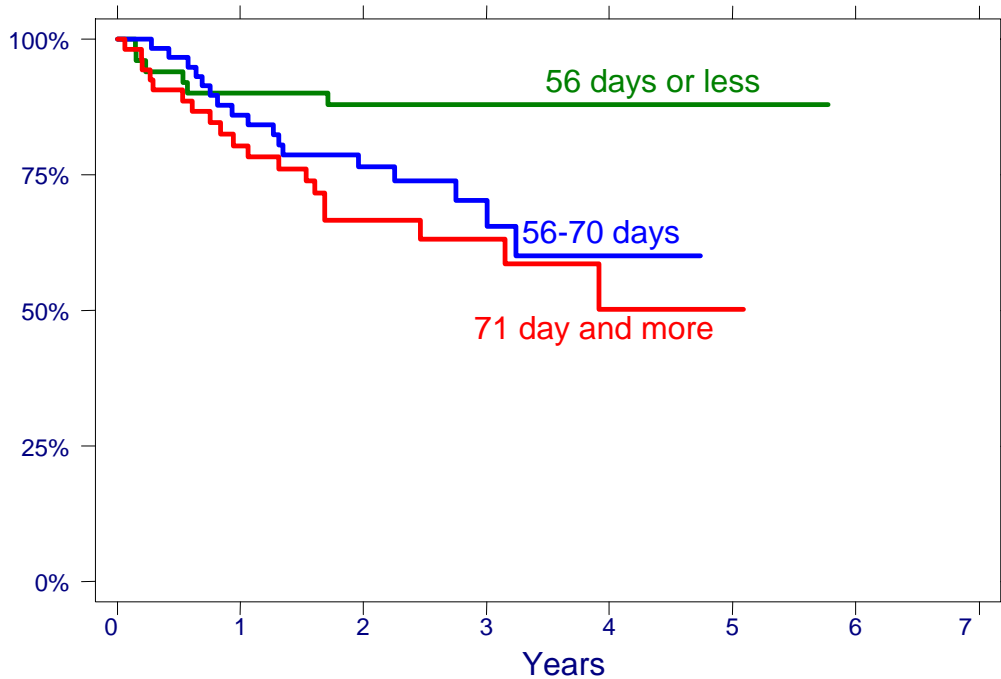

Supplement: MOESM8 [file 9470588]
